# Supplementary figures and images for: Allyl methyl trisulfide protected against acetaminophen (paracetamol)-induced hepatotoxicity by suppressing CYP2E1 and activating Nrf2 in mouse liver
Source: Royal Society of Chemistry journal article supplement (doi:10.1039/c9fo00170k), 2019-01-01

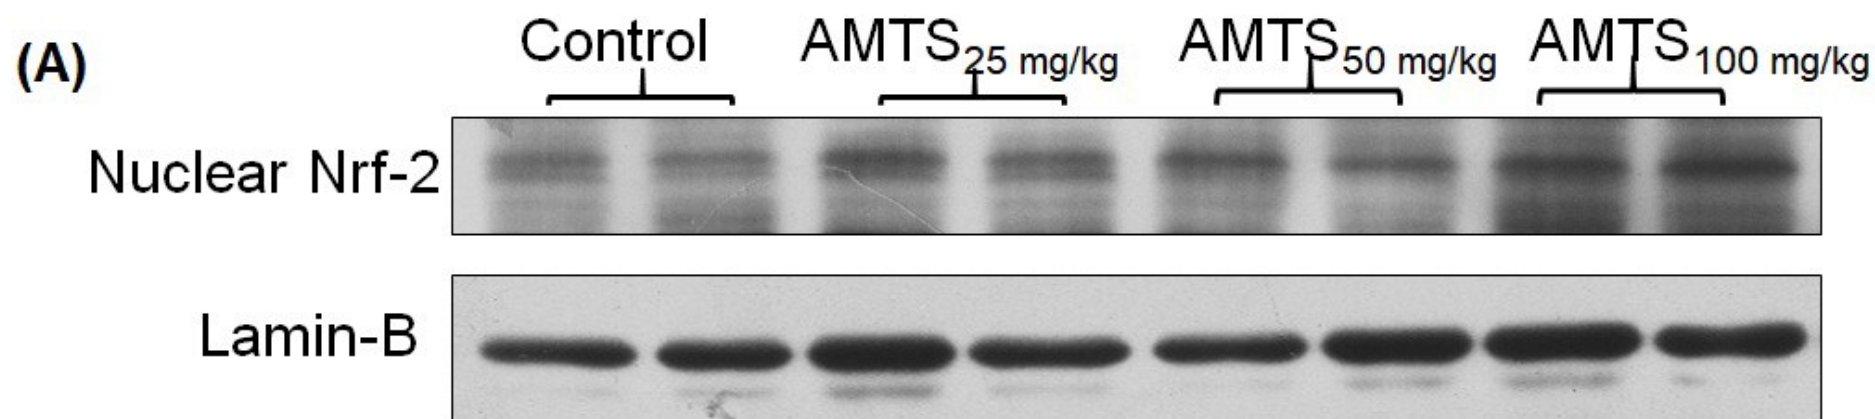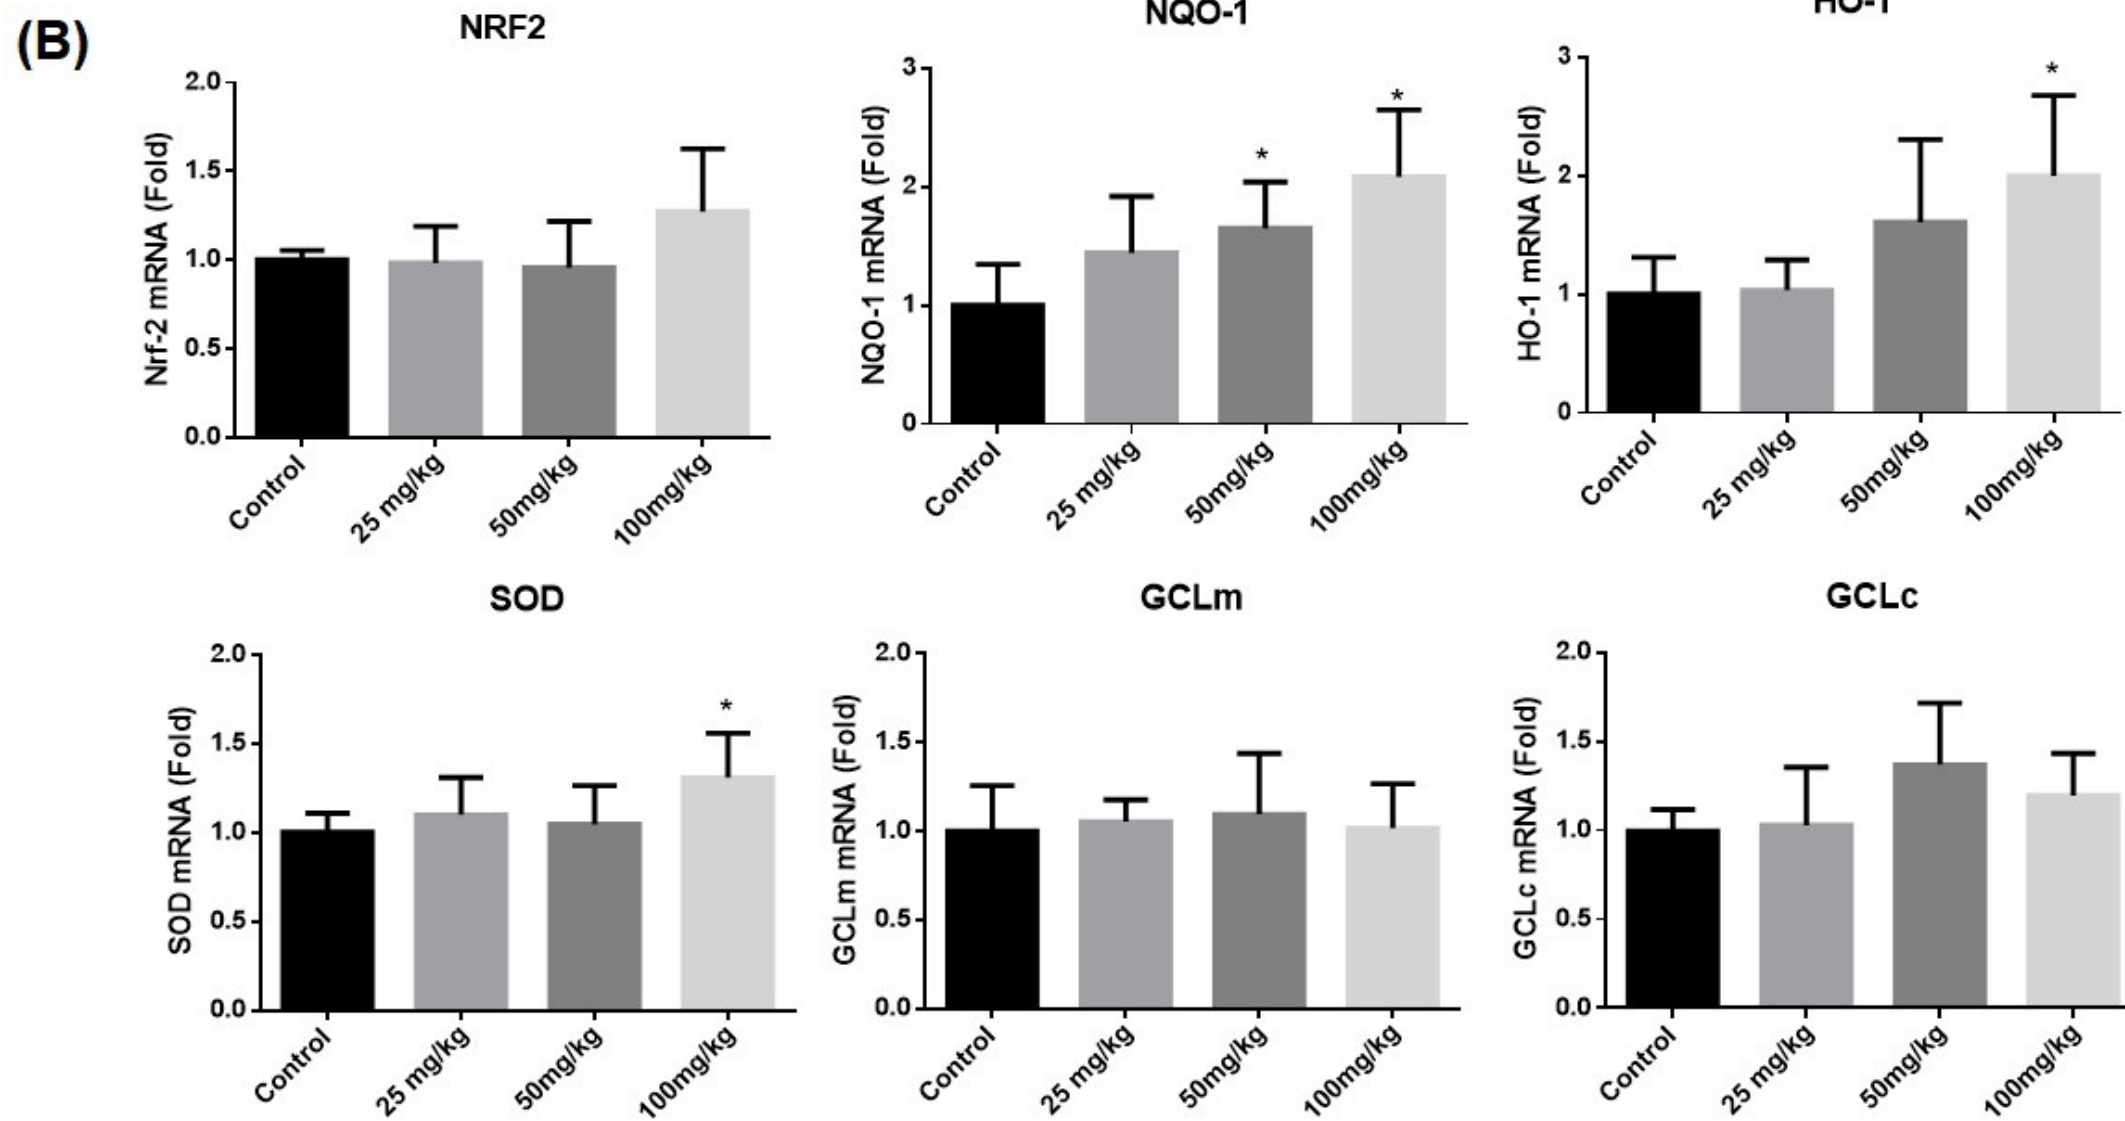

Supplement: c9fo00170k3.pdf [file c9fo00170k3.pdf]
